# Supplementary material for: Impact of a Health Coach–Led, Text-Based Digital Behavior Change Intervention on Weight Loss and Psychological Well-Being in Patients Receiving a Procedureless Intragastric Balloon Program: Prospective Single-Arm Study
Source: PubMed Central journal article supplement (PMC11325120; doi:10.2196/54723), 2024-07-31
Supplement: formative_v8i1e54723_app3.pdf [file formative_v8i1e54723_app3.pdf]

**Multimedia Appendix 3: Percentage of participants who scored positively each item of the participant-reported satisfaction surveys to measure engagement, acceptability of the intervention, and impact on behavior change.**

|                                                                                                                                                               | Proportion of participants rating the item with a positive score, % (n/N) <sup>a</sup> |                  |                  |                                       |                                        |
|---------------------------------------------------------------------------------------------------------------------------------------------------------------|----------------------------------------------------------------------------------------|------------------|------------------|---------------------------------------|----------------------------------------|
|                                                                                                                                                               | Month 1                                                                                | Month 3          | Month 6          | Average Months 1, 3, 6 (during DBCCI) | Month 12 (6 months after end of DBCCI) |
| <b>Items rated on a 5-point Likert scale</b>                                                                                                                  |                                                                                        |                  |                  |                                       |                                        |
| “I have found the health coaching useful/helpful”                                                                                                             | 82.81<br>(53/64)                                                                       | 80.39<br>(41/51) | 82.50<br>(33/40) | 81.90                                 | NA                                     |
| “I feel supported by my health coach towards meeting my weight goals” (Months 1, 3) and “My study health coaches helped me to meet my weight goals” (Month 6) | 85.71<br>(54/63)                                                                       | 82.14<br>(46/56) | 76.92<br>(30/39) | 81.59                                 | NA                                     |
| “My health coach has helped me develop strategies to lose weight”                                                                                             | 69.35<br>(43/62)                                                                       | 69.64<br>(39/56) | 80.00<br>(32/40) | 73.00                                 | NA                                     |
| “I feel confident that I can reach my goal weight and maintain it” (Months 1, 3 only)                                                                         | 67.69<br>(44/65)                                                                       | 66.07<br>(37/56) | NA               | 66.88                                 |                                        |
| “I feel confident about making changes to help me lose weight” (Months 1, 3) and “I feel confident about maintaining my weight loss” (Months 6, 12)           | 90.91<br>(60/66)                                                                       | 91.23<br>(52/57) | 57.50<br>(23/40) | 79.88                                 | 45.00 (18/40)                          |
| “I have been able to put the information and actions from the articles (weight loss actions) into practice”                                                   | 76.56<br>(49/64)                                                                       | 62.96<br>(34/54) | 56.76<br>(21/37) | 65.43                                 | NA                                     |
| “I have made a plan to change my eating habits”                                                                                                               | 92.42<br>(61/66)                                                                       | 87.72<br>(50/57) | 85.00<br>(34/40) | 88.38                                 | 77.50 (31/40)                          |
| “I have made a plan to change my physical activity habits”                                                                                                    | 83.33<br>(55/66)                                                                       | 81.82<br>(45/55) | 82.50<br>(33/40) | 82.55                                 | 65.00 (26/40)                          |
| “I have made a plan to change my sleep habits”                                                                                                                | 51.61<br>(32/62)                                                                       | 34.62<br>(18/52) | 42.11<br>(16/38) | 42.78                                 | 43.59 (17/39)                          |
| “I am aware of some of the barriers to me reaching my weight goals”                                                                                           | 89.39<br>(59/66)                                                                       | 89.47<br>(51/57) | 74.36<br>(29/39) | 84.41                                 | 55.00 (22/40)                          |
| “My health coaching was personalized to my needs”                                                                                                             | 71.43<br>(45/63)                                                                       | 73.21<br>(41/56) | 53.85<br>(21/39) | 66.16                                 | NA                                     |
| “I have found the articles (weight loss actions) sent by the health coaches useful/helpful”                                                                   | 78.12<br>(50/64)                                                                       | 68.52<br>(37/54) | 66.67<br>(26/39) | 71.10                                 | NA                                     |

---

**Items rated on an 11-point Likert scale**

---

|                                                                                                                                                        |                  |                  |                  |       |               |
|--------------------------------------------------------------------------------------------------------------------------------------------------------|------------------|------------------|------------------|-------|---------------|
| “How satisfied have you been tracking your weight, using the connected scales, on a scale from 0 (not at all satisfied) to 10 (completely satisfied)?“ | 89.39<br>(59/66) | 84.21<br>(48/57) | 82.50<br>(33/40) | 85.37 | 95.83 (23/24) |
|--------------------------------------------------------------------------------------------------------------------------------------------------------|------------------|------------------|------------------|-------|---------------|

---

<sup>a</sup>A positive score was defined as a score  $\geq 3$  (ie, “slightly agree” or “strongly agree”) for items rated on a 5-point Likert scale (0-4), or score  $\geq 5$  for items rated on an 11-point Likert scale (0-10; see Methods). DBCCI, digital behavior change coaching intervention; n, number of participants who gave a positive score; N, total number of participants with available responses; NA, not assessed.
